# Supplementary material
Source: bioRxiv or medRxiv preprint supplement (https://www.biorxiv.org/highwire/filestream/118625/field_highwire_adjunct_files/3/391268-4.pdf)
Supplement: Supplementary file [file 391268-4.pdf]

**Extended Data Table 1. Diversity estimates of malaria infections**

| Infection | Deploid |             |            | Single Cell Sequencing         |                               |
|-----------|---------|-------------|------------|--------------------------------|-------------------------------|
|           | FWS     | Effective K | Inferred K | Effective Number of Haplotypes | Observed Number of Haplotypes |
| MAL1      | 0.64    | 1.95        | 3          | 1.8                            | 2                             |
| MAL2      | 0.95    | 1.79        | 2          |                                |                               |
| MAL3      | 0.97    | 1.86        | 2          |                                |                               |
| MAL4      | 0.69    | 2.72        | 3          |                                |                               |
| MAL5      | 0.73    | 1.43        | 2          | 1.6                            | 2                             |
| MAL6      | 0.99    | 1.88        | 2          |                                |                               |
| MAL7      | 0.99    | 1.76        | 2          |                                |                               |
| MAL8      | 0.99    | 1.50        | 2          |                                |                               |
| MAL9      | 0.98    | 1.78        | 2          |                                |                               |
| MAL10     | 1.00    | 1.64        | 2          |                                |                               |
| MAL11     | 0.88    | 1.44        | 2          |                                |                               |
| MAL12     | 0.68    | 1.99        | 2          |                                |                               |
| MAL13     | 0.74    | 2.50        | 3          |                                |                               |
| MAL14     | 0.90    | 1.72        | 2          |                                |                               |
| MAL15     | 0.65    | 2.86        | 4          | 6.49                           | 17                            |
| MAL16     | 0.99    | 1.77        | 2          |                                |                               |
| MAL17     | 0.51    | 3.91        | 4          | 4.23                           | 7                             |
| MAL18     | 0.99    | 1.63        | 2          |                                |                               |
| MAL19     | 0.99    | 2.33        | 3          |                                |                               |
| MAL20     | 0.99    | 1.87        | 2          |                                |                               |
| MAL21     | 0.99    | 1.00        | 1          |                                |                               |
| MAL22     | 0.94    | 1.85        | 2          |                                |                               |
| MAL23     | 0.87    | 1.53        | 3          | 1.35                           | 5                             |
| MAL24     | 0.42    | 2.72        | 3          | 4.63                           | 7                             |
| MAL25     | 0.86    | 1.30        | 2          |                                |                               |
| MAL26     | 0.55    | 3.88        | 5          |                                |                               |
| MAL27     | 0.97    | 1.92        | 2          |                                |                               |
| MAL28     | 0.58    | 2.44        | 3          |                                |                               |
| MAL29     | 0.98    | 1.84        | 2          | 1                              | 1                             |
| MAL30     | 0.59    | 2.18        | 3          | 3.79                           | 8                             |
| MAL31     | 0.98    | 1.84        | 2          | 1                              | 1                             |
| MAL32     | 0.65    | 2.23        | 3          | 2.17                           | 3                             |
| MAL33     | 0.60    | 2.13        | 3          | 1                              | 1                             |
| MAL34     | 0.96    | 1.88        | 2          |                                |                               |
| MAL35     | 0.98    | 1.72        | 2          |                                |                               |
| MAL36     | 0.99    | 1.77        | 2          |                                |                               |
| MAL37     | 0.58    | 2.09        | 3          | 1                              | 1                             |
| MAL38     | 0.99    | 1.82        | 2          | 1                              | 1                             |
| MAL39     | 0.69    | 1.90        | 3          |                                |                               |
| MAL40     | 0.80    | 3.18        | 4          |                                |                               |
| MAL41     | 0.98    | 1.42        | 2          |                                |                               |
| MAL42     | 0.91    | 1.89        | 2          |                                |                               |
| MAL43     | 0.82    | 2.33        | 3          | 1.64                           | 3                             |
| MAL44     | 0.99    | 1.65        | 2          |                                |                               |
| MAL45     | 0.67    | 2.52        | 3          |                                |                               |
| MAL46     | 0.86    | 2.45        | 3          |                                |                               |
| MAL47     | 1.00    | 2.51        | 3          |                                |                               |
| MAL48     | 0.82    | 1.68        | 3          | 2.24                           | 6                             |
| MAL49     | 0.97    | 1.66        | 2          |                                |                               |
